# Supplementary material
Source: PubMed Central journal article supplement (PMC5587381)

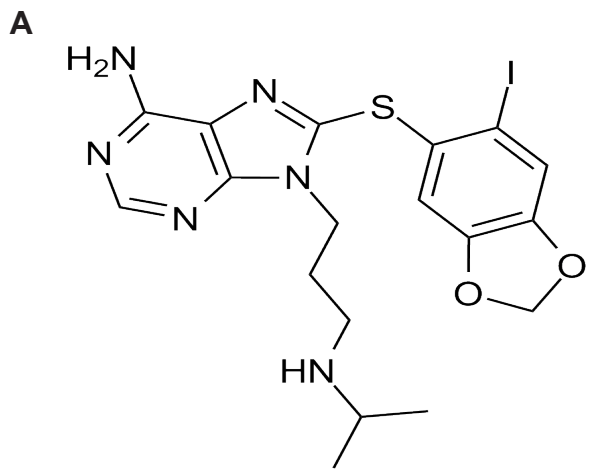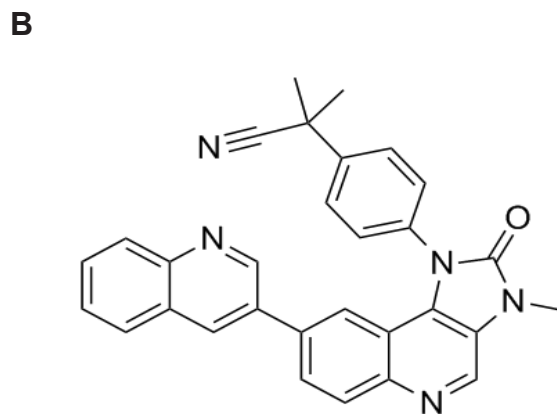

Supplemental Figure 1

Supplement: NIHMS885602-supplement-2.pdf [file NIHMS885602-supplement-2.pdf]

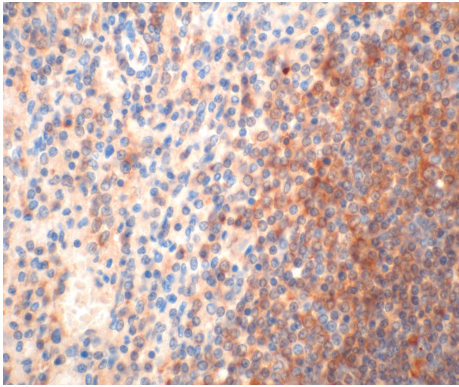

**Tonsil**

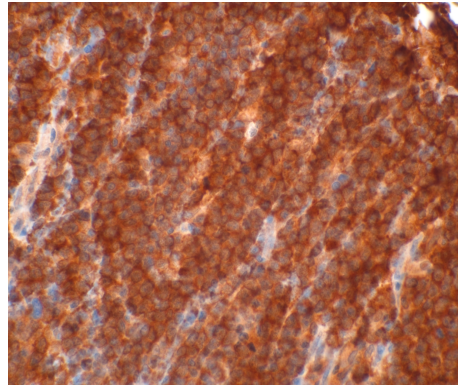

**Tumor**

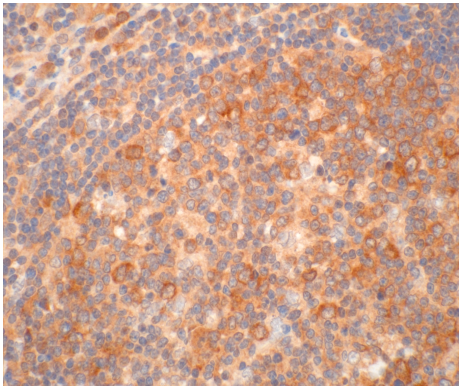

**Lymph Node**

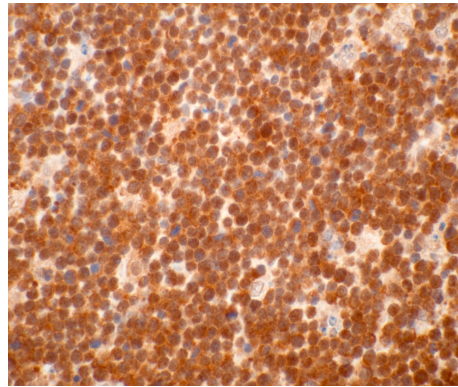

**Tumor**

**Supplemental Figure 2**

Supplement: NIHMS885602-supplement-3.pdf [file NIHMS885602-supplement-3.pdf]

**A**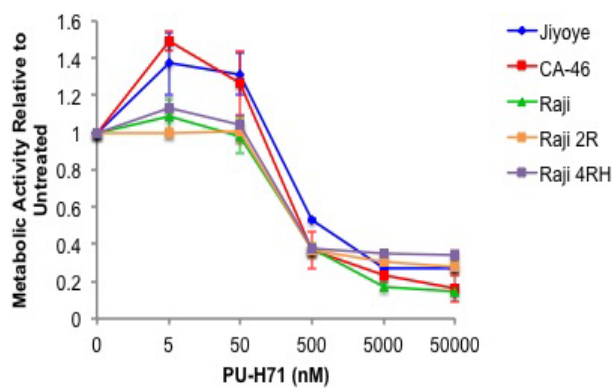**B**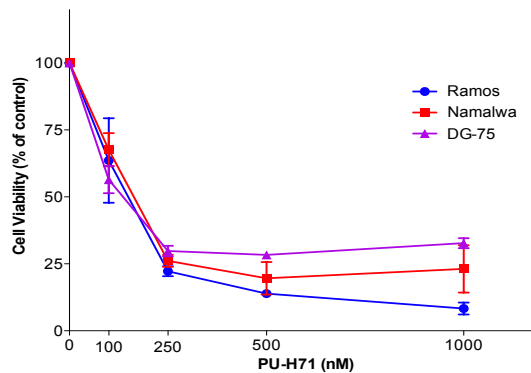**C**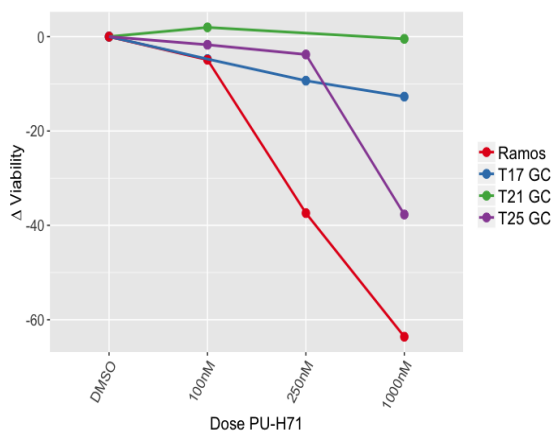

**Supplemental Figure 3**

Supplement: NIHMS885602-supplement-4.pdf [file NIHMS885602-supplement-4.pdf]

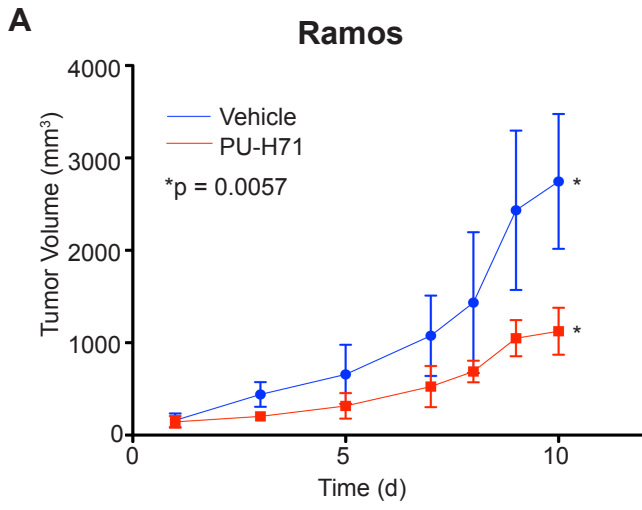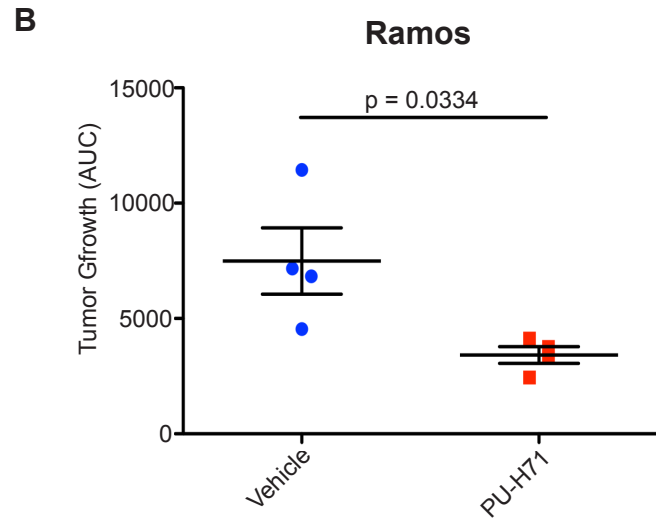

**Supplemental Figure 4**

Supplement: NIHMS885602-supplement-5.pdf [file NIHMS885602-supplement-5.pdf]

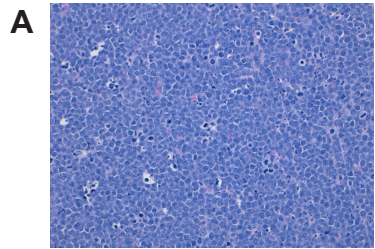

H&E

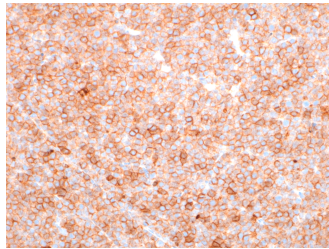

CD20

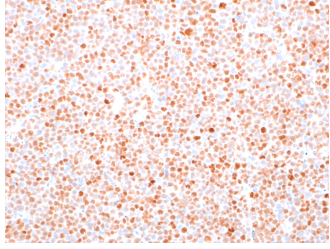

BCL6

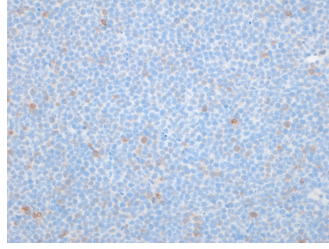

BCL2

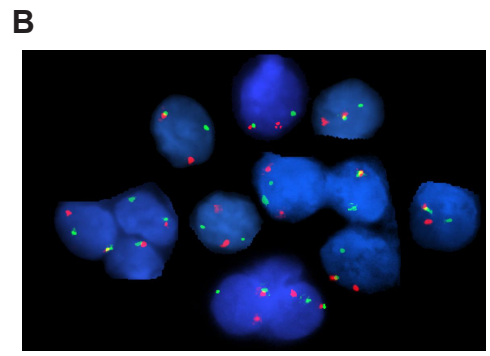

**Supplemental Figure 5**

Supplement: NIHMS885602-supplement-6.pdf [file NIHMS885602-supplement-6.pdf]

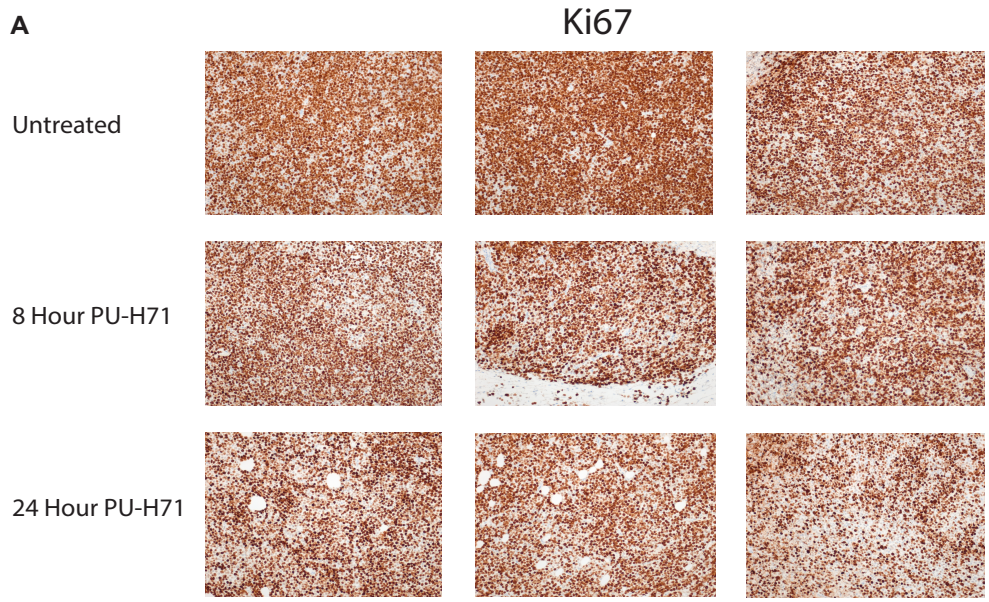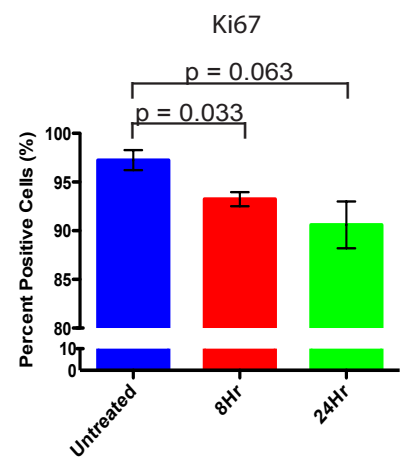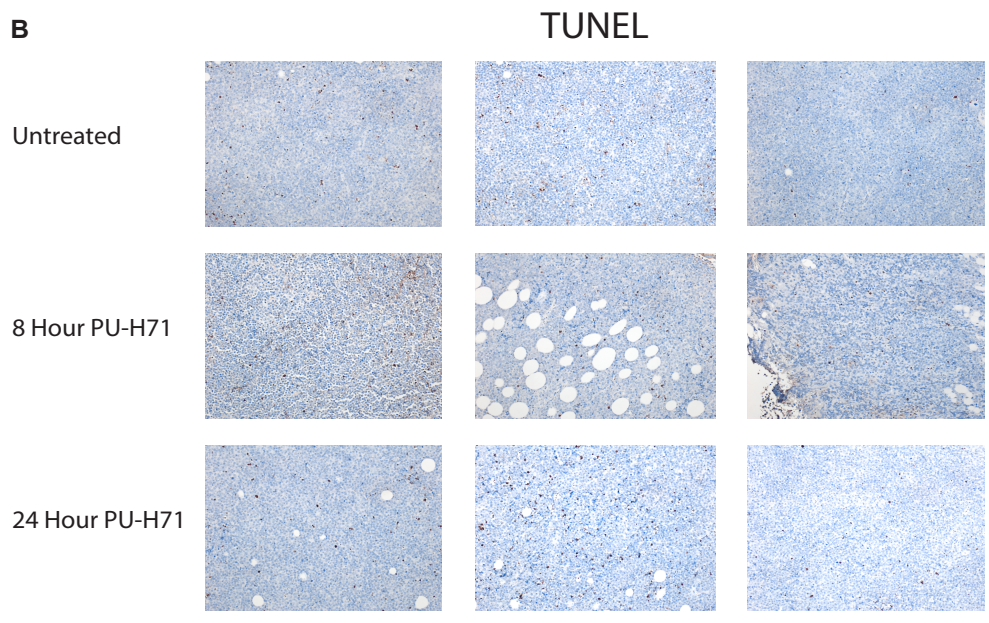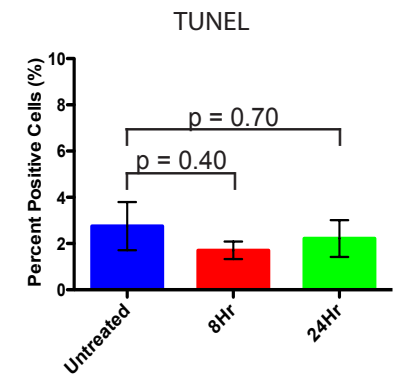

**Supplemental Figure 6**

Supplement: NIHMS885602-supplement-7.pdf [file NIHMS885602-supplement-7.pdf]
